# Supplementary material for: Nano-wired polyaniline/VS2 composite materials for quasi-solid-state supercapacitor and zinc-ion battery applications
Source: Royal Society of Chemistry journal article supplement (doi:10.1039/d3ma00070b), 2023-01-01
Supplement: d3ma00070b1.pdf [file d3ma00070b1.pdf]

## Supporting Information

### Nano-wired Polyaniline/VS<sub>2</sub> Composite Materials for All-solid-state Supercapacitor and Zinc-ion Battery Applications

Saad Zafar, Santosh K. Singh\*, and Bimlesh Lochab\*

*<sup>a</sup>Department of Chemistry, School of Natural Sciences, Shiv Nadar Institution of Eminence, Delhi-NCR-201314*

\*Bimlesh Lochab

Materials Chemistry Laboratory, Department of Chemistry, School of Natural Sciences, Shiv Nadar Institution of Eminence, Delhi-NCR-201314, India

Email: bimlesh.lochab@snu.edu.in

\*Santosh K. Singh

Electrochemical Energy Laboratory, Department of Chemistry, School of Natural Sciences, Shiv Nadar Institution of Eminence, Delhi-NCR-201314, India

Email: santosh.singh1@snu.edu.in

#### Table of content:

**Figure S1.** BJH pore size distribution curve of (a) PANI, VS<sub>2</sub>, and PANI/VS<sub>2</sub>, (b) TGA curve of VS<sub>2</sub> and PANI/VS<sub>2</sub>---S4

**Figure S2.** Electrochemical performances in 0.5 M H<sub>2</sub>SO<sub>4</sub> electrolyte. (a) CV curves for PANI, VS<sub>2</sub>, and PANI/VS<sub>2</sub> samples at a scan rate of 10 mV/s, (b) GCD curves at the current density of 2 A.g<sup>-1</sup> (c) CV curves of PANI/VS<sub>2</sub> in three electrodes from 5 mV s<sup>-1</sup> to 100 mV s<sup>-1</sup> (d) GCD curves of PANI/VS<sub>2</sub> in three electrodes from 2 A g<sup>-1</sup> to 20 A.g<sup>-1</sup> (e) CV curves of PANI/VS<sub>2</sub> in two electrodes from 5 mV s<sup>-1</sup> to 100 mV s<sup>-1</sup> (f) GCD curves of PANI/VS<sub>2</sub> in two electrodes from 1 A g<sup>-1</sup> to 5 A g<sup>-1</sup> ---S5

**Figure S3.** Floating test as a function of capacitance at 1 A g<sup>-1</sup>. Test experiment with 5 GCD cycles and 2 h of voltage holding till 15 cycles. The floating test analysis of the QSSC device shows ~68% retention in the specific capacitance after the durability test.----S6

**Figure S4.** Post-mortem SEM analysis of the QSSC device after 500 cycles (a) low and (b) high resolution image. An agglomeration of the active materials is observed.----S6

**Figure S5.** Electrochemical performance of PANI in 0.5 M H<sub>2</sub>SO<sub>4</sub> electrolyte. (a) CV curves at different scan rates, and (b) GCD curves at different current density. ---S7

**Figure S6.** Electrochemical performance of VS<sub>2</sub> in the three-electrode system, (a) EIS impedance, (b) CV curves at different scan rates, and (c) GCD curves at different current density—S8

**Figure S7.** Electrochemical performance of PANI/VS<sub>2</sub> in the three-electrode system, (a) EIS impedance, and (b) capacity retention plot at the different current rate, ----S9

**Figure S8.** Electrochemical performance of PANI/VS<sub>2</sub> in the two-electrode system, (a) EIS impedance, and (b) capacity retention plot at the different current rates. -----S9

**Figure S9:** Cycling stability data recorded at the GCD current rate of 0.5 A g<sup>-1</sup>.----S10

**Table 1.** Summary of features of various cathode materials in aqueous ZIBs, such as energy storage mechanisms, testing voltage, discharge capacity, and electrolyte components-----S10

**Supplementary video S1.** Demonstration of ZIB by emitting the SNIoE logo using 36 red LED bulbs of 3 V connected in parallel (at 3x speed). ----S11

**References.** ....S11

**Experimental details for surface area and pore size distribution.** The BET surface area and pore volume were determined by using nitrogen adsorption/desorption isotherms at 77.35 K on Quantachrome analyzer. All samples were degassed for 6 h at 150 °C prior to analysis. BET surface area was measured using the BET (Brunauer–Emmett–Teller) method in relative pressure range of  $P/P_o$  (0.05–0.3) and total pore volume ( $V_t$ ) was taken at  $P/P_o = 0.99$ . Total micropore area ( $S_{micro}$ ), external surface area ( $S_{ext}$ ), and micropore volume ( $V_{micro}$ ) were determined using  $t$ -plot method. Mesopore volume was calculated as the difference of total pore volume ( $V_t$ ) and micropore volume ( $V_{micro}$ ). The mesoporous nature of the material is further confirmed by the experimental determination using the Barrett–Joyner–Halenda (BJH) pore size distribution curves.

Micropore area and micropore volume were calculated from de Boer’s linear thickness plot ( $t$ -plot).

Thickness of the adsorbed layer of  $N_2$  was calculated according to de Boer’s equation:

$$\text{Thickness of adsorbent (in \AA)} = 0.88(P/P_o)^2 + 6.45(P/P_o) + 2.98 \quad \text{Equation (S1a)}$$

According to de Boer’s formula,

$$\text{Micropore area} = \text{slope} \times 15.47 \quad \text{Equation S1b}$$

$$\text{Micropore volume} = \text{intercept} \times 0.001547 \quad \text{Equation S1c}$$

From the desorption curve,  $1/[W(P_o/P) - 1]$  vs  $P/P_o$  linear plot was obtained. ‘ $W$ ’ is the weight of adsorbate ( $N_2$ ) per unit mass of adsorbent. The value of ‘ $W$ ’ was derived from sorbed volume of  $N_2$  ( $V$ ), Density of  $N_2$  ( $0.808 \text{ g L}^{-1}$ ) and weight of the adsorbate taken.

Specific surface area was calculated from the linear plot of  $1/[W(P_o/P) - 1]$  vs  $P/P_o$ .

$$W_m = \frac{1}{\text{Slope} + \text{Intercept}} \quad \text{Equation S2a}$$

Where,  $W_m$  = Weight of the adsorbate as monolayer

$$\text{Total Surface Area, } S_{total} = \frac{W_m \cdot N_A \cdot A_{CS}}{M} \quad \text{Equation S2b}$$

$N_A$  = Avogadro Number,  $A_{CS}$  = Cross sectional area of the adsorbate ( $16.2 \text{ \AA}^2 \text{ mol}^{-1}$  for  $N_2$ ),  
 $M$  = MW of Adsorbate ( $28.013 \text{ g mol}^{-1}$  for  $N_2$ )

$$\text{Specific Surface Area, } S = \frac{S_{total}}{W} \quad \text{Equation S2c}$$

$W$  = Weight of the adsorbent taken

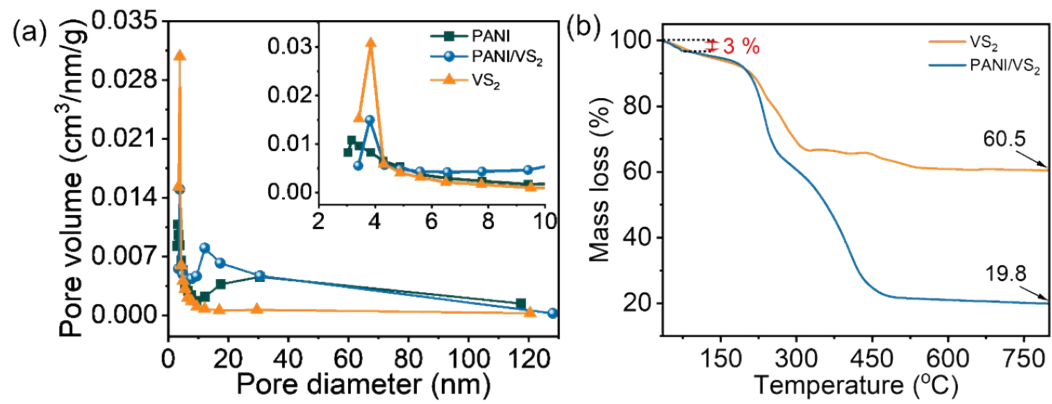

**Figure S1.** (a) BJH pore size distribution curve of PANI, PANI/VS<sub>2</sub> and VS<sub>2</sub> composite (b) TGA curve of VS<sub>2</sub> and PANI/VS<sub>2</sub>.

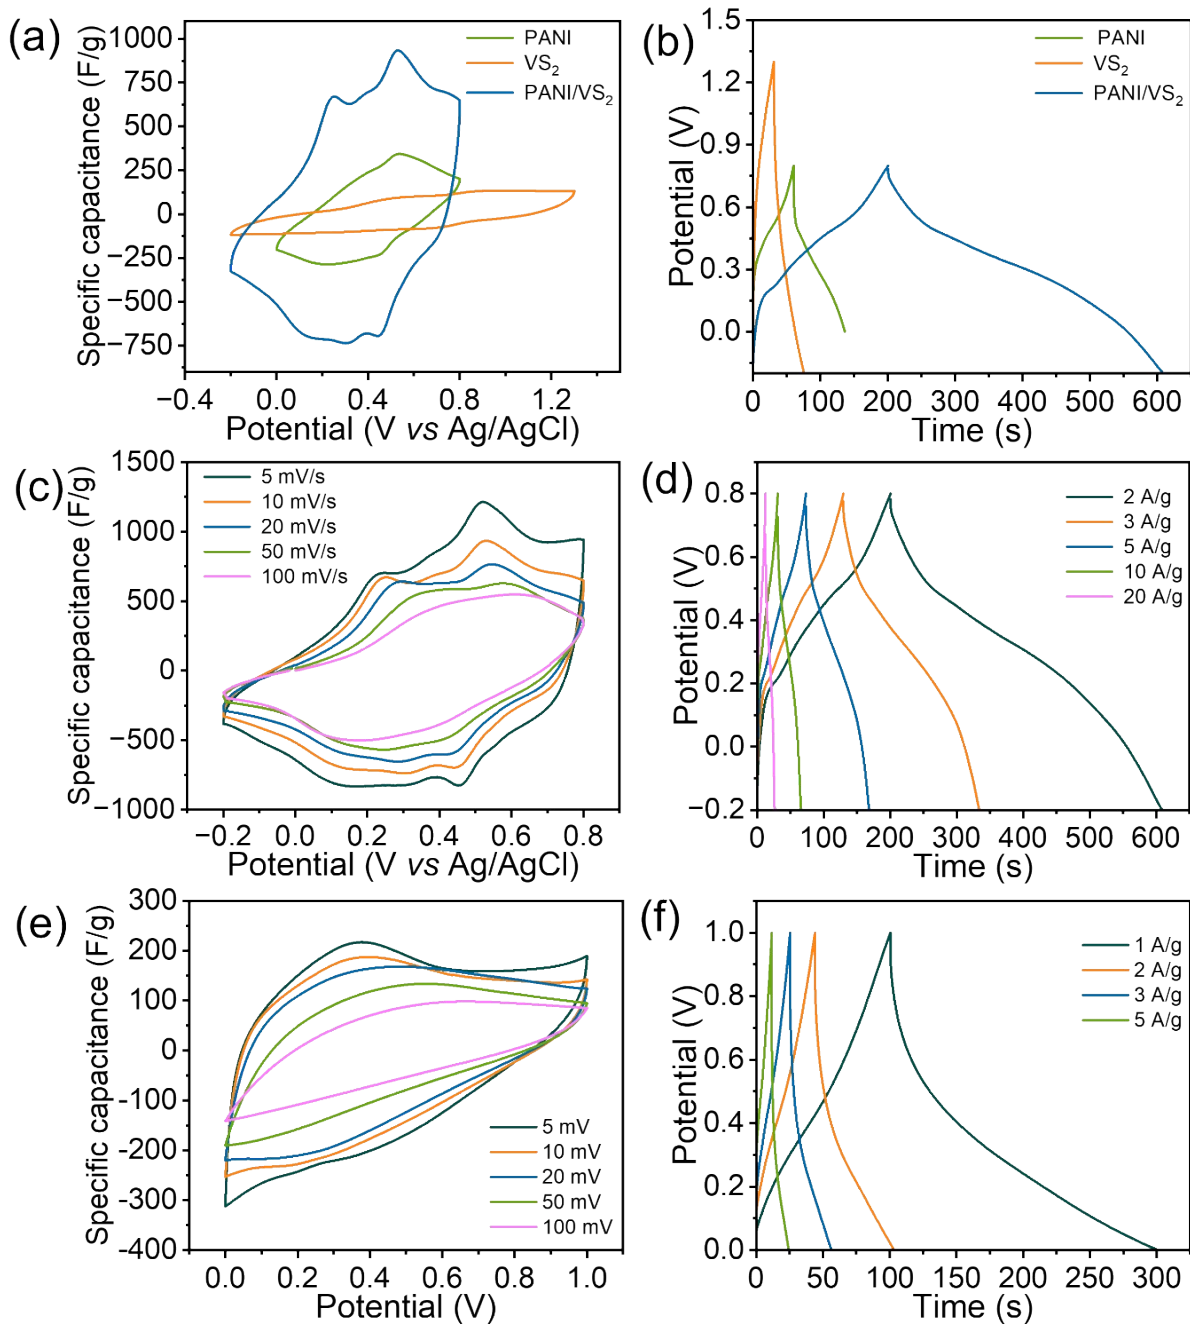

**Figure S2.** Electrochemical performances in 0.5 M H<sub>2</sub>SO<sub>4</sub> electrolyte. (a) CV curves for PANI, VS<sub>2</sub>, and PANI/VS<sub>2</sub> samples at a scan rate of 10 mV/s, (b) GCD curves at the current density of 2 A g<sup>-1</sup>, (c) CV curves of PANI/VS<sub>2</sub> in three electrodes from 5 mV s<sup>-1</sup> to 100 mV s<sup>-1</sup> (d) GCD curves of PANI/VS<sub>2</sub> in three-electrode from 2 A g<sup>-1</sup> to 20 A g<sup>-1</sup>, (e) CV curves of PANI/VS<sub>2</sub> in two-electrode from 5 mV s<sup>-1</sup> to 100 mV s<sup>-1</sup>, and (f) GCD curves of PANI/VS<sub>2</sub> in two-electrode from 1 A g<sup>-1</sup> to 5 A g<sup>-1</sup>.

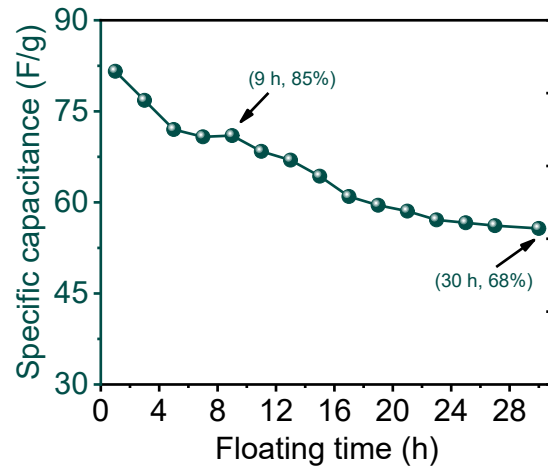

**Figure S3.** Floating test as a function of capacitance at  $1 \text{ A g}^{-1}$ . Test experiment with 5 GCD cycles and 2 h of voltage holding till 15 cycles. The floating test analysis of the QSSC device shows  $\sim 68\%$  retention in the specific capacitance after the durability test.

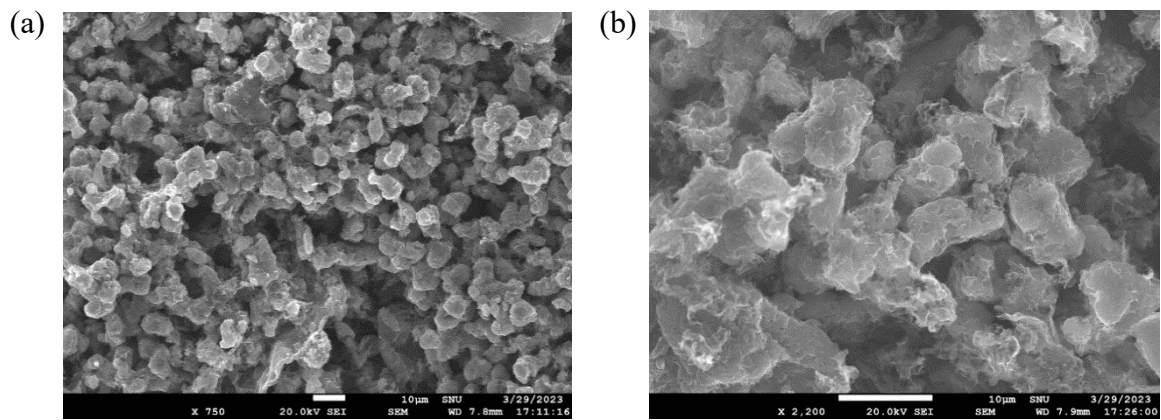

**Figure S4.** Post-mortem SEM analysis of the QSSC device after 500 cycles (a) low and (b) high resolution image. An agglomeration of the active materials is observed.

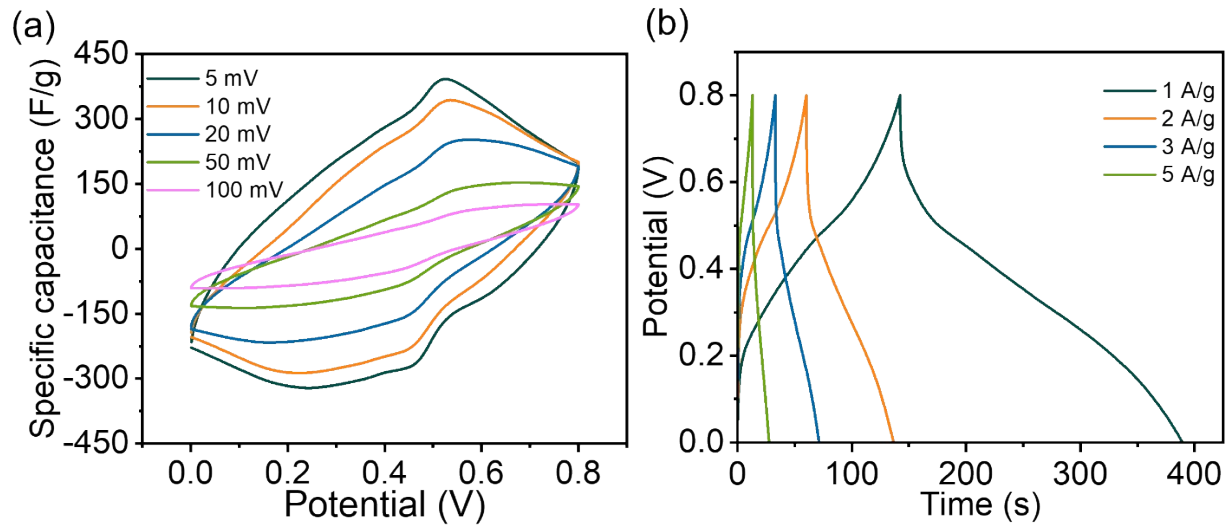

**Figure S5.** Electrochemical performance of PANI in 0.5 M H<sub>2</sub>SO<sub>4</sub> electrolyte. (a) CV curves at different scan rates, and (b) GCD curves at different current density.

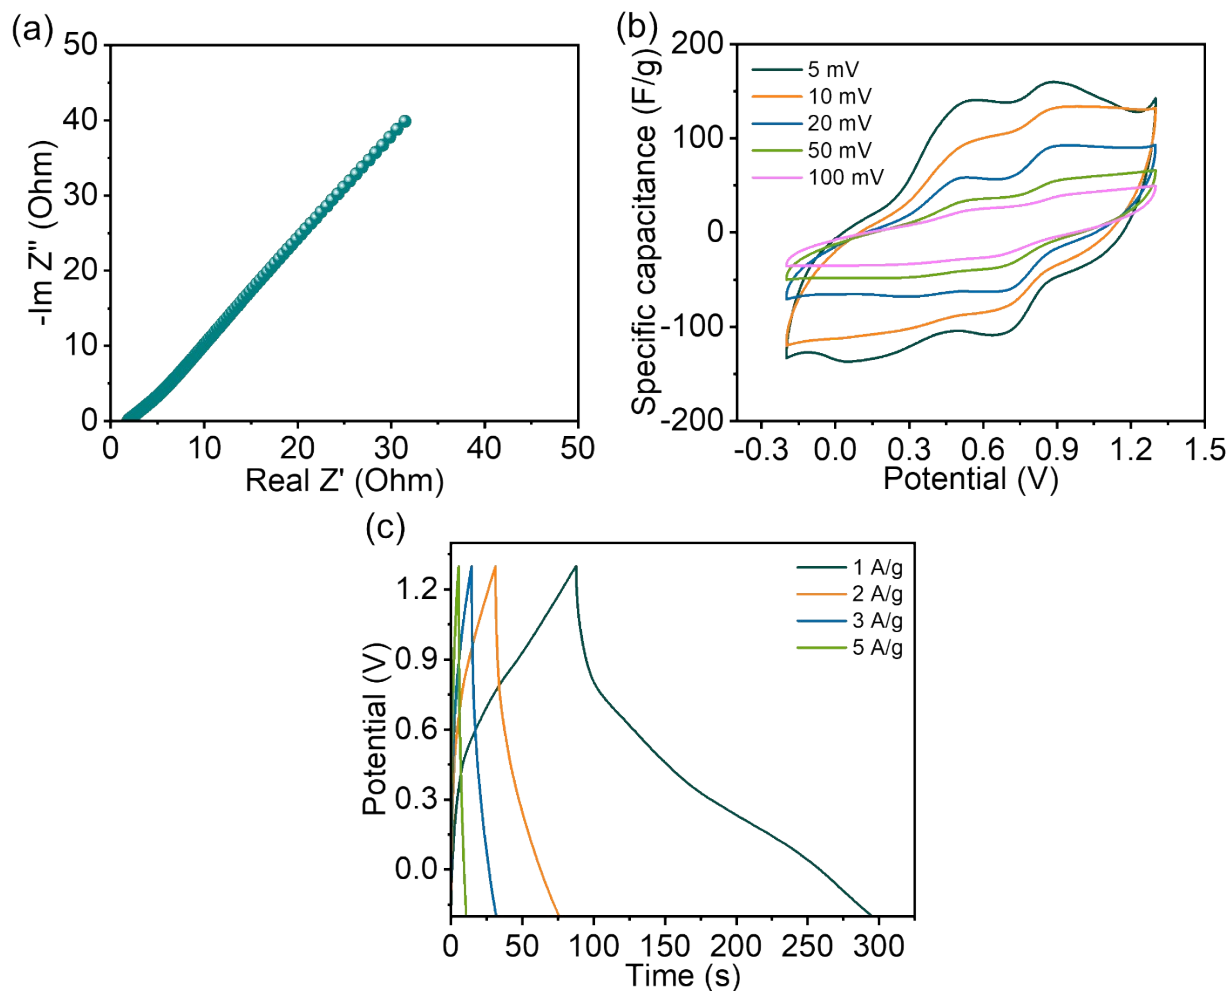

**Figure S6.** Electrochemical performance of VS<sub>2</sub> in a three-electrode system, (a) EIS impedance, (b) CV curves at different scan rates, and (c) GCD curves at different current density.



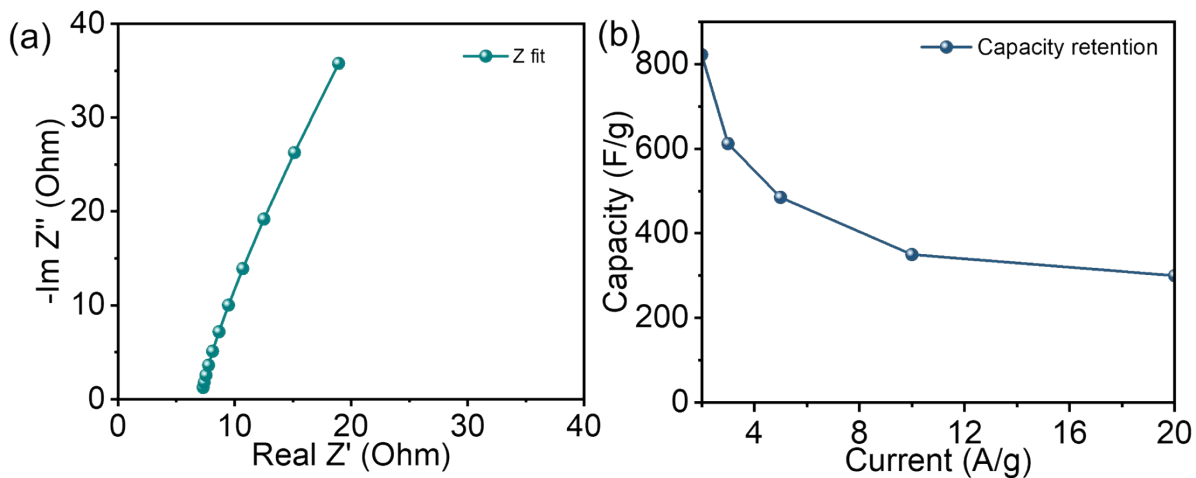

**Figure S7.** Electrochemical performance of PANI/VS<sub>2</sub> in the three-electrode system, (a) EIS impedance, and (b) capacity retention plot at the different current rates.

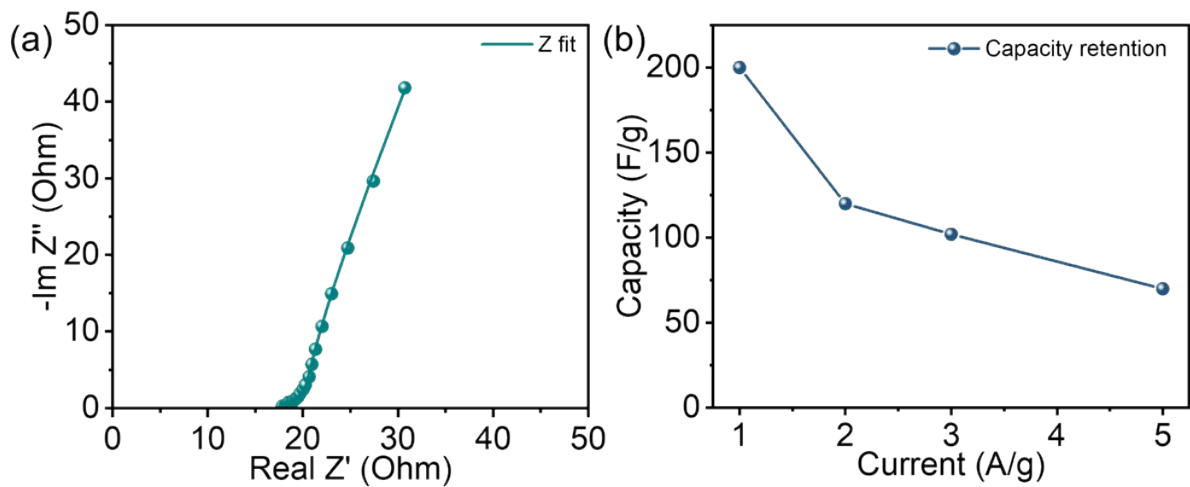

**Figure S8.** Electrochemical performance of PANI/VS<sub>2</sub> in the two-electrode system, (a) EIS impedance, and (b) capacity retention plot at the different current rates.

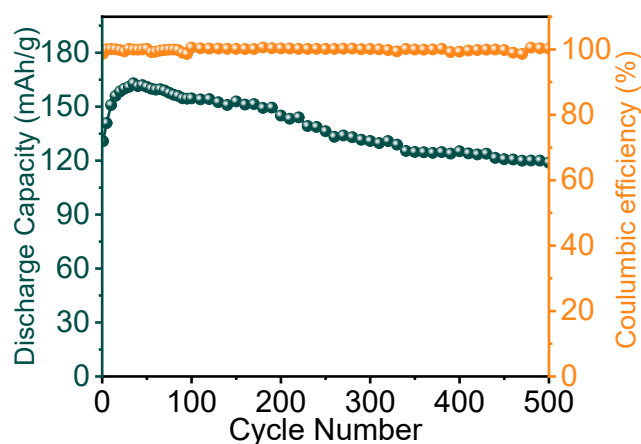

**Figure S9.** Cycling stability data recorded at the GCD current rate of  $0.5 \text{ A g}^{-1}$ .

**Table 1.** Summary of features of various cathode materials in aqueous ZIBs, such as energy storage mechanisms, testing voltage, discharge capacity, and electrolyte components

| Cathode material                                                                   | Reaction mechanism                                    | Testing voltage (V) | Discharge capacity                                 | Electrolyte components                                | Reference       |
|------------------------------------------------------------------------------------|-------------------------------------------------------|---------------------|----------------------------------------------------|-------------------------------------------------------|-----------------|
| $\alpha$ -MnO <sub>2</sub>                                                         | Zn <sup>2+</sup> insertion/extraction                 | 0.7-2.0             | 210 mAhg <sup>-1</sup> (21 mAhg <sup>-1</sup> )    | 1 M ZnSO <sub>4</sub>                                 | 1               |
| $\alpha$ -MnO <sub>2</sub>                                                         | Zn <sup>2+</sup> insertion/extraction                 | 1.0-1.9             | 210 mAhg <sup>-1</sup> (0.5 C)                     | Zn(NO <sub>3</sub> ) <sub>2</sub>                     | 2               |
| $\beta$ -MnO <sub>2</sub>                                                          | Zn <sup>2+</sup> insertion/extraction                 | 0.8-1.9             | 307 mAhg <sup>-1</sup> (0.32 C)                    | 3 M Zn(CF <sub>3</sub> SO <sub>3</sub> ) <sub>2</sub> | 3               |
| ZnMn <sub>2</sub> O <sub>4</sub>                                                   | Zn <sup>2+</sup> insertion/extraction                 | 0.8-2.0             | 150 mAhg <sup>-1</sup> (50 mAhg <sup>-1</sup> )    | 3 M Zn(CF <sub>3</sub> SO <sub>3</sub> ) <sub>2</sub> | 4               |
| Mn <sub>3</sub> O <sub>4</sub>                                                     | Zn <sup>2+</sup> insertion/extraction                 | 0.8-1.9             | 239.2 mAhg <sup>-1</sup> (100 mAhg <sup>-1</sup> ) | 2 M ZnSO <sub>4</sub>                                 | 5               |
| FeFe(CN) <sub>6</sub>                                                              | Zn <sup>2+</sup> insertion/extraction                 | 1.0-2.0             | 112 mAhg <sup>-1</sup> (10 mAhg <sup>-1</sup> )    | 1.0 M Zn(OAc) <sub>2</sub> in [Ch]OAc + water         | 6               |
| Zn <sub>3</sub> V <sub>2</sub> O <sub>7</sub> (OH) <sub>2</sub> ·2H <sub>2</sub> O | Zn <sup>2+</sup> insertion/extraction                 | 0.2-1.8             | 213 mAhg <sup>-1</sup> (50 mAhg <sup>-1</sup> )    | 1 M ZnSO <sub>4</sub>                                 | 7               |
| Na <sub>3</sub> V <sub>2</sub> (PO <sub>4</sub> ) <sub>2</sub> F <sub>3</sub>      | Zn <sup>2+</sup> insertion/extraction                 | 0.8-1.9             | 64.7 mAhg <sup>-1</sup> (80 mAhg <sup>-1</sup> )   | 2 M Zn(CF <sub>3</sub> SO <sub>3</sub> ) <sub>2</sub> | 8               |
| PANI/VS <sub>2</sub>                                                               | H <sup>+</sup> /Zn <sup>2+</sup> insertion/extraction | 0.4-1.9             | 219 mAhg <sup>-1</sup> (100 mAhg <sup>-1</sup> )   | 1 M Zn(CF <sub>3</sub> SO <sub>3</sub> ) <sub>2</sub> | <b>Our work</b> |

**Supplementary video S1.** Demonstration of ZIB by emitting the SNIoE logo using 36 red LED bulbs of 3 V connected in parallel (at 3x speed).

## References

1. Lee, B.; Yoon, C. S.; Lee, H. R.; Chung, K. Y.; Cho, B. W.; Oh, S. H. Electrochemically-Induced Reversible Transition from the Tunneled to Layered Polymorphs of Manganese Dioxide. *Sci. Rep.* **2015**, 4, 6066.
2. Xu, C.; Li, B.; Du, H.; Kang, F. Energetic zinc ion chemistry: the Rechargeable Zinc Ion Battery. *Angew. Chem., Int. Ed.* **2012**, 51, 933–5.
3. Zhang, N.; Cheng, F.; Liu, J.; Wang, L.; Long, X.; Liu, X.; Li, F.; Chen, J. Rechargeable Aqueous Zinc-Manganese Dioxide Batteries with High Energy and Power Densities. *Nat. Commun.* **2017**, 8, 405.
4. Zhang, N.; Cheng, F.; Liu, Y.; Zhao, Q.; Lei, K.; Chen, C.; Liu, X.; Chen, J. Cation-Deficient Spinel  $\text{ZnMn}_2\text{O}_4$  Cathode in  $\text{Zn}(\text{CF}_3\text{SO}_3)_2$  Electrolyte for Rechargeable Aqueous Zn-Ion Battery. *J. Am. Chem. Soc.* **2016**, 138, 12894–12901.
5. Hao, J. W.; Mou, J.; Zhang, J. W.; Dong, L. B.; Liu, W. B.; Xu, C. J.; Kang, F. Y. Electrochemically Induced Spinel-Layered Phase Transition of  $\text{Mn}_3\text{O}_4$  in High Performance Neutral Aqueous Rechargeable Zinc Battery. *Electrochim. Acta* **2018**, 259, 170–178.
6. Liu, Z.; Pulletikurthi, G.; Endres, F. A Prussian Blue/Zinc Secondary Battery with a Bio-Ionic Liquid-Water Mixture as Electrolyte. *ACS Appl. Mater. Interfaces* **2016**, 8, 12158–64.
7. Xia, C.; Guo, J.; Lei, Y.; Liang, H.; Zhao, C.; Alshareef, H. N. Rechargeable Aqueous Zinc-Ion Battery Based on Porous Framework Zinc Pyrovanadate Intercalation Cathode. *Adv. Mater.* **2018**, 30, 1705580.
8. Li, W.; Wang, K.; Cheng, S.; Jiang, K. A Long-Life Aqueous Zn-Ion Battery Based on  $\text{Na}_3\text{V}_2(\text{PO}_4)_2\text{F}_3$  Cathode. *Energy Storage Mater.* **2018**, 15, 14–21.
